# Supplementary material
Source: HighWire-hosted journal article supplement (http://www.jrheum.org/highwire/filestream/29650/field_highwire_adjunct_files/0/DataSupplement130814.pdf)
Supplement: DataSupplement130814.pdf [file DataSupplement130814.pdf]

Online supplement to: A Systemic Literature Review on the Application of Rasch Analysis in Musculoskeletal Disease — A Special Interest Group Report of OMERACT 11;

doi:10.3899/jrheum.130814

Supplementary Table 1. Diagnosis of patient groups, instruments evaluated and Rasch applications of the included articles.

| First authors                         | Year | Diagnosis | Instrument Name                                                                                                                 | New/existing Instrument | Methodology |
|---------------------------------------|------|-----------|---------------------------------------------------------------------------------------------------------------------------------|-------------------------|-------------|
| <b>Rheumatologic Diagnosis (N=65)</b> |      |           |                                                                                                                                 |                         |             |
| Covic T. <sup>[5]</sup>               | 2012 | RA        | Hospital Anxiety and Depression Scale (HADS), Depression Anxiety & Stress Scale (DASS)                                          | Existing                | 2           |
| Woodburn J. <sup>[6]</sup>            | 2011 | RA        | Foot Impact Scale for Rheumatoid Arthritis (FIS-RA)                                                                             | Existing                | 2           |
| Niedermann K. <sup>[7]</sup>          | 2011 | RA        | Joint Protection Self-Efficacy Scale (JPSES)                                                                                    | New                     | 1           |
| Ndosi M. <sup>[8]</sup>               | 2011 | RA        | Educational Needs Assessment Tool (ENAT)                                                                                        | Existing                | 2           |
| Katz PP. <sup>[9]</sup>               | 2011 | RA        | Short Form of the Valued Life Activities Disability Questionnaire (S-VLA)                                                       | New                     | 1           |
| Tang K. <sup>[10]</sup>               | 2011 | RA        | Work Instability Scale for Rheumatoid Arthritis (RA-WIS)                                                                        | Existing                | 4           |
| Tang K. <sup>[11]</sup>               | 2011 | RA        | Work Instability Scale for Rheumatoid Arthritis (RA-WIS)                                                                        | Existing                | 2           |
| McTaggart-Cowan HM. <sup>[12]</sup>   | 2010 | RA        | Construct Rheumatoid Arthritis Health States                                                                                    | New                     | 4           |
| Paulsen T. <sup>[13]</sup>            | 2010 | RA        | Measure of Activity Performance of the Hand (MAP-hand)                                                                          | New                     | 1           |
| Gilworth G. <sup>[14]</sup>           | 2009 | RA        | Work Instability Scale for Rheumatoid Arthritis (RA-WIS)                                                                        | Existing                | 2           |
| Cieza A. <sup>[15]</sup>              | 2009 | RA        | International Classification of Functioning, Disability and Health (ICF) category interval scale for energy and drive functions | Existing                | 4           |
| Covic T. <sup>[16]</sup>              | 2009 | RA        | Center for Epidemiological Studies Depression (CES-D) scale, Hospital Anxiety and Depression Scale (HADS)                       | Existing                | 2           |
| Ten Klooster PM. <sup>[17]</sup>      | 2008 | RA        | Health Assessment Questionnaire (HAQ) disability index (DI), HAQ-II                                                             | Existing                | 2           |
| Chogle AR. <sup>[18]</sup>            | 2008 | RA        | Health Assessment Questionnaire (HAQ), Short Form 36 Physical Function (SF-PF)                                                  | Existing                | 2           |
| Uhlig T. <sup>[19]</sup>              | 2007 | RA        | ICF core set for RA                                                                                                             | Existing                | 2           |
| Durez P. <sup>[20]</sup>              | 2007 | RA        | Manual ability for adults with upper limb impairments (ABILHAND)                                                                | New                     | 2           |
| Covic T. <sup>[21]</sup>              | 2007 | RA        | Center for Epidemiologic Studies-Depression scale (CES-D)                                                                       | Existing                | 2           |
| Niedermann K. <sup>[22]</sup>         | 2007 | RA        | German version of the Joint Protection Behavior Assessment (D-JPBA-S)                                                           | Existing                | 2           |
| Martin M. <sup>[23]</sup>             | 2007 | RA        | Modified health assessment questionnaire (MHAQ)                                                                                 | New                     | 1           |
| Chiou CF. <sup>[24]</sup>             | 2006 | RA        | Multiattribute preference weight functions (MAPWF)                                                                              | New                     | 1           |

|                      |      |                                 |                                                                                                                                    |          |   |
|----------------------|------|---------------------------------|------------------------------------------------------------------------------------------------------------------------------------|----------|---|
| Chiou CF. [25]       | 2006 | RA                              | Revised Cedars-Sinai Health-related Quality of Life for Rheumatoid Arthritis Instrument (CSHQ-RA)                                  | New      | 2 |
| Tanmaru M. [26]      | 2006 | RA                              | Rheumatoid Arthritis Quality of Life scale (RAQoL)                                                                                 | Existing | 2 |
| Helliwell P. [27]    | 2005 | RA                              | Foot Impact Scale (FIS)                                                                                                            | New      | 1 |
| Kucukdeveci AA. [28] | 2004 | RA                              | Health Assessment Questionnaire (HAQ)                                                                                              | Existing | 4 |
| Wolfe F. [29]        | 2004 | RA, OA, fibromyalgia            | Short Arthritis Assessment Scale (SAS)                                                                                             | New      | 1 |
| Wolfe F. [30]        | 2004 | RA, OA, fibromyalgia            | Revised Health Assessment Questionnaire (HAQ-II)                                                                                   | New      | 1 |
| Wolfe F. [31]        | 2003 | RA, OA, fibromyalgia            | Regional Pain Scale (RPS)                                                                                                          | New      | 1 |
| Gilworth G. [32]     | 2003 | RA                              | Work Instability Scale (WIS)                                                                                                       | New      | 1 |
| Kutlay S. [33]       | 2003 | RA                              | Rheumatoid Arthritis Quality of Life scale (RAQoL)                                                                                 | Existing | 2 |
| Sheehan TJ. [34]     | 2001 | RA                              | Health Assessment Questionnaire (HAQ)                                                                                              | Existing | 4 |
| Wolfe F. [35]        | 2001 | RA                              | Health Assessment Questionnaire (HAQ)                                                                                              | Existing | 2 |
| Wolfe F. [36]        | 2000 | RA                              | Short erosion scale (SES)                                                                                                          | New      | 1 |
| Wolfe F. [37]        | 1999 | RA, OA, fibromyalgia            | Western Ontario MacMaster Questionnaire (WOMAC)                                                                                    | Existing | 2 |
| Penta M. [38]        | 1998 | RA                              | Manual ability for adults with upper limb impairments (ABILHAND)                                                                   | New      | 1 |
| Nordenskiöld U. [39] | 1996 | RA                              | Evaluation of Daily Activities Questionnaire (EDAQ)                                                                                | New      | 2 |
| Tennant A. [40]      | 1996 | RA, other arthritis (mainly OA) | Health Assessment Questionnaire (HAQ)                                                                                              | Existing | 2 |
| Franchignoni F. [41] | 2012 | OA (knee, hip)                  | Lequesne's algofunctional index (LAI) - knee, hip                                                                                  | Existing | 2 |
| Goetz C. [42]        | 2011 | OA                              | Osteoarthritis of knee and hip quality of life (OAKHQOL)                                                                           | Existing | 2 |
| Haugen IK. [43]      | 2011 | OA (hand)                       | Australian/Canadian (AUSCAN) index, Arthritis Impact Measurement Scale 2 (AIMS-2), Functional Index of hand osteoarthritis (FIHOA) | Existing | 2 |
| Tang K. [44]         | 2010 | OA                              | Work Instability Scale for Rheumatoid Arthritis (RA-WIS)                                                                           | Existing | 2 |
| Keenan AM. [45]      | 2008 | OA                              | Osteoarthritis Quality of Life (OAQOL)                                                                                             | New      | 1 |
| Davis AM. [46]       | 2008 | OA (hip)                        | Hip disability and Osteoarthritis Outcome Score-Physical Function Shortform (HOOS-PS)                                              | New      | 1 |
| Rothenfluh DA. [47]  | 2008 | OA (hip)                        | 12-item Western Ontario MacMaster Questionnaire (WOMAC)                                                                            | Existing | 2 |
| Perruccio AV. [48]   | 2008 | OA (knee)                       | Knee injury and Osteoarthritis Outcome Score-Physical Function Short-form (KOOS-PS)                                                | New      | 1 |
| Conaghan PG. [49]    | 2007 | OA (knee)                       | Oxford knee scale (OKS)                                                                                                            | Existing | 2 |
| Conaghan PG. [50]    | 2006 | OA (knee)                       | Whole-organ magnetic resonance imaging scoring system (WORMS)                                                                      | New      | 2 |

|                       |      |                    |                                                                                                                                                                                        |          |   |
|-----------------------|------|--------------------|----------------------------------------------------------------------------------------------------------------------------------------------------------------------------------------|----------|---|
| Roorda LD.<br>[51]    | 2004 | OA                 | Western Ontario MacMaster Questionnaire (WOMAC)                                                                                                                                        | Existing | 2 |
| O'Malley KJ.<br>[52]  | 2003 | OA (knee)          | Joint-Specific Multidimensional Assessment of Pain (J-MAP)                                                                                                                             | New      | 1 |
| Ryser L. [53]         | 1999 | OA (hip, knee)     | German Western Ontario MacMaster Questionnaire (WOMAC)                                                                                                                                 | Existing | 2 |
| El Miedany Y.<br>[54] | 2011 | AS                 | Combined ankylosing spondylitis questionnaire-functional impairment (CASQ-FI), Combined ankylosing spondylitis questionnaire-quality of life (CASQ-QOL)                                | New      | 1 |
| Haywood KL.<br>[55]   | 2010 | AS                 | Evaluation of Ankylosing Spondylitis Quality of Life (EASiQoL)                                                                                                                         | New      | 1 |
| Gilworth G.<br>[56]   | 2009 | AS                 | Work instability scale for Ankylosing Spondylitis (AS-WIS)                                                                                                                             | New      | 1 |
| Rauch A. [57]         | 2009 | AS, RA             | ICF core sets for AS and RA                                                                                                                                                            | Existing | 2 |
| Doward LC.<br>[58]    | 2003 | AS                 | Quality of Life instrument specific to Ankylosing Spondylitis (ASQOL)                                                                                                                  | New      | 1 |
| Leung YY. [59]        | 2008 | PsA                | Short Form 36 (SF-36) physical functioning subscale (PF), Health Assessment Questionnaire (HAQ), Bath Ankylosing Spondylitis Functional Index (BASFI), Dougados Functional Index (DFI) | Existing | 2 |
| Taylor WJ. [60]       | 2007 | PsA, RA            | Health Assessment Questionnaire (HAQ) disability index (DI) and Short Form 36 (SF-36) physical functioning subscale (PF)                                                               | Existing | 2 |
| McKenna SP.<br>[61]   | 2004 | PsA                | Quality of Life instrument specific to Psoriatic Arthritis (PsAQoL)                                                                                                                    | New      | 1 |
| Pouchot J. [62]       | 2004 | Juvenile arthritis | Children Health Assessment Questionnaire (CHAQ)                                                                                                                                        | Existing | 2 |
| Tennant A. [63]       | 2001 | Juvenile arthritis | Children Health Assessment Questionnaire (CHAQ)                                                                                                                                        | Existing | 2 |
| Taylor WJ. [64]       | 2008 | Gout               | Health Assessment Questionnaire disability index (HAQ-DI)                                                                                                                              | Existing | 2 |
| Leong KP. [65]        | 2005 | SLE                | Systemic lupus erythematosus-specific quality-of-life instrument (SLEQOL)                                                                                                              | New      | 1 |
| Brunner HI.<br>[66]   | 2003 | SLE                | Systemic Lupus International Collaborating Clinics/American College of Rheumatology Disease Damage Index (SLICC/ACR-DI)                                                                | Existing | 2 |
| Doward LC.<br>[67]    | 2009 | SLE                | Quality-of-life instrument specific to systemic lupus erythematosus (L-QoL)                                                                                                            | New      | 1 |
| Vanthuyne M.<br>[68]  | 2009 | Systemic Sclerosis | Systemic sclerosis-adapted manual ability for adults with upper limb impairments (ABILHAND)                                                                                            | New      | 2 |
| Gothwal VK.<br>[59]   | 2010 | Sjogren's Syndrome | McMonnies Questionnaire                                                                                                                                                                | Existing | 2 |

## General Musculoskeletal Diagnosis (N=45)

- Unspecified

|                |      |                            |                                                                                                          |          |   |
|----------------|------|----------------------------|----------------------------------------------------------------------------------------------------------|----------|---|
| Koller B. [70] | 2011 | MSK disorder, work related | German version of the Worker Role Interview, WRI (WRI-G 10.0)                                            | Existing | 2 |
| Hung M. [71]   | 2011 | MSK disorder, unspecified  | Patient-reported outcomes measurement information system (PROMIS) physical function item bank v1 (PPFIB) | Existing | 2 |

|                         |      |                           |                                                                                                                               |          |   |
|-------------------------|------|---------------------------|-------------------------------------------------------------------------------------------------------------------------------|----------|---|
| Medina-Mirapeix F. [72] | 2011 | MSK disorder, unspecified | Mobility activity measure                                                                                                     | New      | 1 |
| Chen CC. [73]           | 2010 | MSK disorder, unspecified | Manual ability measure 36 (MAM-36)                                                                                            | New      | 2 |
| Pallant JF. [74]        | 2007 | MSK disorder, unspecified | Hospital Anxiety and Depression Scale (HADS)                                                                                  | Existing | 4 |
| Grill E. [75]           | 2009 | MSK disorder, unspecified | International Classification of Functioning, Disability and Health (ICF) Core Set for Musculoskeletal Conditions              | Existing | 4 |
| Gilworth G. [76]        | 2007 | MSK disorder, unspecified | Nurse-Work Instability Scale (Nurse-WIS)                                                                                      | New      | 1 |
| Young NL. [77]          | 2000 | MSK disorder, unspecified | Activities Scale for Kids (ASK)                                                                                               | Existing | 2 |
| Baker JG. [78]          | 1997 | MSK disorder              | Medical Rehabilitation Follow Along (MRFA): musculoskeletal, neurological and multiple sclerosis, cardiac and pulmonary forms | New      | 2 |

• **Pain In Body Part**

|                       |      |                                          |                                                                                    |          |   |
|-----------------------|------|------------------------------------------|------------------------------------------------------------------------------------|----------|---|
| Farin E. [79]         | 2012 | Pain (low back)                          | Communication behavior, Kommunikationsverhalten (KOVA)                             | New      | 1 |
| Bostan C. [80]        | 2012 | Pain (low back), breast cancer, stroke   | International Classification of Functioning, Disability and Health (ICF) Checklist | Existing | 4 |
| Hall AM. [81]         | 2012 | Pain (low back)                          | Working Alliance Inventory Theory of Change Inventory (WATOICI)                    | Existing | 2 |
| Stuge B. [82]         | 2011 | Pain (pelvic girdle, pregnancy related)  | Pelvic Girdle Questionnaire (PGQ)                                                  | New      | 1 |
| Searle RD. [83]       | 2011 | Pain (low back pain, OA pain, limb pain) | Leeds Assessment of Neuropathic Symptoms and Signs (LANSS)                         | Existing | 2 |
| Parkitny L. [84]      | 2011 | Pain (low back)                          | Depression, anxiety and stress scale (DASS-21)                                     | Existing | 2 |
| Oztuna D. [85]        | 2011 | Pain (low back)                          | ICF core set for low back pain                                                     | Existing | 2 |
| Hilfiker R. [86]      | 2009 | Pain (low back)                          | ICF core set for low back pain                                                     | New      | 2 |
| Davidson M. [87]      | 2009 | Pain (low back)                          | Roland Morris Disability Questionnaire                                             | Existing | 2 |
| Roe C. [88]           | 2009 | Pain (low back)                          | ICF core set for low back pain                                                     | New      | 2 |
| Van Der Velde G. [89] | 2009 | Pain (neck)                              | Neck disability index (NDI)                                                        | Existing | 2 |
| Elhan AH. [90]        | 2008 | Pain (low back)                          | A CAT model for measuring disability in low back pain                              | New      | 3 |
| Davidson M. [91]      | 2008 | Pain (low back)                          | Oswestry Disability Questionnaire (ODQ)                                            | Existing | 2 |
| Siqueira FB. [92]     | 2007 | Pain (low back)                          | Escala Tampa para Cinesiofobia (ETC)                                               | Existing | 2 |
| Karp JF. [93]         | 2008 | Pain (knee, low back)                    | Geriatric depression scale (GDS)                                                   | Existing | 2 |
| Damsgard E. [94]      | 2007 | Pain (low back & wide spread)            | Tampa Scale of Kinesiophobia (TSK)                                                 | Existing | 2 |
| Veloza CA. [95]       | 2006 | Pain (low back)                          | Occupational Rehabilitation Data Base (ORDB) functional capacity instrument        | New      | 1 |
| Davidson M. [96]      | 2004 | Pain (low back)                          | Back specific Short Form-36 Physical Functioning Scale (SF-36 PF)                  | New      | 1 |

|                                                                                    |      |                                                 |                                                                                                             |          |   |
|------------------------------------------------------------------------------------|------|-------------------------------------------------|-------------------------------------------------------------------------------------------------------------|----------|---|
| Garratt AM.<br>[97]                                                                | 2003 | Pain (low back)                                 | Roland Disability Questionnaire (RDQ)                                                                       | Existing | 2 |
| Page SJ. [98]                                                                      | 2002 | Pain (low back)                                 | Revised Oswestry Disability Questionnaire (RODQ)                                                            | Existing | 2 |
| White LJ. [99]                                                                     | 2002 | Pain (low back)                                 | Oswestry Low Back Pain Disability Questionnaire (Oswestry)                                                  | Existing | 2 |
| Kucukdeveci AA. [100]                                                              | 2001 | Pain (low back)                                 | Roland-Morris Disability Questionnaire (RMDQ)                                                               | Existing | 2 |
| Tesio L. [101]                                                                     | 1997 | Pain (low back)                                 | Back Illness Pain and Disability 9-Item Scale (BACKILL)                                                     | New      | 1 |
| McArthur DL.<br>[102]                                                              | 1991 | Pain (low back)                                 | Functional Assessment Screening Questionnaire                                                               | Existing | 4 |
| Boeckstyns M.E.H. [103]                                                            | 1987 | Pain (knee)                                     | Knee pain questionnaire                                                                                     | New      | 1 |
| <ul style="list-style-type: none"> <li>• <b>Arthritis Unspecified</b></li> </ul>   |      |                                                 |                                                                                                             |          |   |
| Davis AM.<br>[104]                                                                 | 2003 | Arthritis (hip, knee)                           | Western Ontario MacMaster Questionnaire (WOMAC)                                                             | Existing | 2 |
| Hibbard JH.<br>[105]                                                               | 2005 | Arthritis, unspecified                          | Patient Activation Measure (PAM)                                                                            | New      | 1 |
| <ul style="list-style-type: none"> <li>• <b>Impairment Of Body Part</b></li> </ul> |      |                                                 |                                                                                                             |          |   |
| Chen CC. [106]                                                                     | 2005 | Body part impairment (hand)                     | Manual ability measure (MAM-16)                                                                             | New      | 1 |
| Hart DL. [107]                                                                     | 2005 | Body part impairment (lower limb)               | Lower extremity functional status (LEFS)                                                                    | Existing | 3 |
| Hart DL. [108]                                                                     | 2006 | Body part impairment (shoulder)                 | Flexilevel Scale of Shoulder Function (Flex-SF)                                                             | Existing | 3 |
| Cook KF. [109]                                                                     | 2003 | Body part impairment (shoulder)                 | Flexilevel Scale of Shoulder Function (Flex-SF)                                                             | New      | 1 |
| Hart DL. [110]                                                                     | 2006 | Body part impairment (spine)                    | Lumbar spine specific computerized adaptive test (CAT)                                                      | New      | 3 |
| Simone A. [111]                                                                    | 2011 | Body part impairment (upper limb)               | Manual ability for adults with upper limb impairments (ABILHAND)                                            | Existing | 2 |
| Franchignoni F. [112]                                                              | 2011 | Body part impairment (upper limb)               | Short measure of physical function and symptoms related to upper-limb musculoskeletal disorders (QuickDASH) | Existing | 2 |
| Franchignoni F. [113]                                                              | 2010 | Body part impairment (upper limb)               | Disability of the Arm, Shoulder and Hand (DASH)                                                             | Existing | 2 |
| Lehman LA.<br>[114]                                                                | 2010 | Body part impairment (upper limb)               | Disability of the Arm, Shoulder and Hand (DASH), UEFI                                                       | Existing | 2 |
| Beaton DE.<br>[115]                                                                | 2005 | Body part impairment (upper limb)               | Short measure of physical function and symptoms related to upper-limb musculoskeletal disorders (QuickDASH) | New      | 1 |
| <ul style="list-style-type: none"> <li>• <b>Orthopedics Diagnosis</b></li> </ul>   |      |                                                 |                                                                                                             |          |   |
| Veloza CA.<br>[116]                                                                | 1999 | Low back injuries                               | Worker Role Interview (WRI)                                                                                 | Existing | 2 |
| Comins J. [117]                                                                    | 2008 | Anterior cruciate ligament (ACL) reconstruction | Knee injury and Osteoarthritis Outcome Score (KOOS)                                                         | Existing | 2 |

|                        |      |                        |                         |          |   |
|------------------------|------|------------------------|-------------------------|----------|---|
| Ko Y. <sup>[118]</sup> | 2009 | Total knee replacement | Oxford Knee Score (OKS) | Existing | 2 |
|------------------------|------|------------------------|-------------------------|----------|---|

Methodology: 1 = Development of new instrument; 2 = Evaluation of psychometric properties of existing instruments, including cross-cultural adaptations; 3 = Construction of item bank and/or computer adaptive test; 4 = Teaching or methodology papers.

AS: ankylosing spondylitis; OA : osteoarthritis; PsA: psoriatic arthritis; RA: rheumatoid arthritis,

MSK: musculoskeletal
